# Supplementary material for: Transcriptome Analysis Revealed Plant Hormone Biosynthesis and Response Pathway Modification by Epichloëgansuensis in Achnatheruminebrians under Different Soil Moisture Availability
Source: MDPI journal article supplement (doi:10.3390/jof7080640), 2021-08-06
Supplement: s1 [file s1]

**Supplementary Table S1** Differentially regulated unigenes associated with alpha-Linolenic acid metabolism - plant hormone signal transduction and phenylalanine of endophyte-infected (EI) and endophyte-free (EF) *A. inebrians* under different moisture content identified in the RNA-seq analysis.

| Pathway                           | Name         | Gene ID         |         | Primers (5'-3')        |
|-----------------------------------|--------------|-----------------|---------|------------------------|
| alpha-Linolenic acid metabolism   | <i>LOX2S</i> | c52310.graph_c1 | Forward | CACGCCCAGCGTGTATTATGC  |
|                                   |              |                 | Reverse | GGAGATGCTTGCAGGGCTCA   |
|                                   | <i>LOX2S</i> | c45642.graph_c0 | Forward | AAGCAGCGAATGGAAAGCG    |
|                                   |              |                 | Reverse | CGGAGACCGACCCAAGTAA    |
|                                   | <i>LOX2S</i> | c49382.graph_c0 | Forward | GTCTTCGCTACCGTGCAAGC   |
|                                   |              |                 | Reverse | AAGGGCCGAATCGCCATTGA   |
|                                   | <i>AOS</i>   | c20317.graph_c0 | Forward | GCGTCTGCTCCTACCTCGAC   |
|                                   |              |                 | Reverse | AGTAGGCGTCGCCGATGAAC   |
|                                   | <i>AOS</i>   | c57984.graph_c0 | Forward | GGTGGTGGCTGACGAGTAGATT |
|                                   |              |                 | Reverse | GGCAGACACGGTTAAGGAGGA  |
|                                   | <i>OPR</i>   | c43265.graph_c0 | Forward | GTTCTGGCGGCTTTCCTGA    |
|                                   |              |                 | Reverse | CAAGGGCGCCGTCATCTTCT   |
|                                   | <i>OPR</i>   | c43265.graph_c1 | Forward | CCCTTGAACGCCTCCCTGTA   |
|                                   |              |                 | Reverse | AACGACCACGGCATCCTCTA   |
|                                   | <i>ACX</i>   | c59834.graph_c1 | Forward | GCCAAGGACACGGAGTAGGC   |
|                                   |              |                 | Reverse | CGTCGTCTCTGCGACCACAA   |
| Plant hormone signal transduction | <i>JAZ</i>   | c41910.graph_c0 | Forward | CCACATCGCCATTCCCTCG    |
|                                   |              |                 | Reverse | TGCTCAGCCGCTTCGTCA     |
|                                   | <i>JAZ</i>   | c48335.graph_c0 | Forward | CCCGTCCACCAAGGTCAAGG   |
|                                   |              |                 | Reverse | GACGCCGTAACGGAGGTGTT   |
|                                   | <i>JAZ</i>   | c42148.graph_c0 | Forward | TTCTGCTCCGCCTTCACG     |
|                                   |              |                 | Reverse | CCACCGCACCACAAACATC    |
|                                   | <i>JMT</i>   | c44403.graph_c0 | Forward | CTTCTCGCTGTTCTTGC      |

|                                         |             |                 |         |                       |
|-----------------------------------------|-------------|-----------------|---------|-----------------------|
|                                         |             |                 | Reverse | GTCCCACATGCTGCTCAC    |
| Phenylalanine                           | <i>PAL</i>  | c46915.graph_c1 | Forward | GCGCGAGATCAACTCCGTCA  |
|                                         |             |                 | Reverse | GCGATCTCGGTGCCCTTGAA  |
|                                         | <i>NPR1</i> | c57587.graph_c0 | Forward | ACGCTTCTTCCCACGCTGTT  |
|                                         |             |                 | Reverse | CCGGATGGCTCCGATTGAGG  |
| Plant hormone<br>signal<br>transduction | <i>TGA</i>  | c48977.graph_c0 | Forward | ATGGAGGGCATCGTCAGG    |
|                                         |             |                 | Reverse | ACGGAGGCGGTGGAAGTAG   |
|                                         | <i>PR-1</i> | c40880.graph_c0 | Forward | CATGCCGCCGGAGGGAATAA  |
|                                         |             |                 | Reverse | TGGATGAACGTGGTGGCTTCT |
